# Supplementary material
Source: Springer Nature journal article supplement (https://www.springermedizin.de/resource/supplementary/12955_2012_1134_MOESM1_ESM.pdf/9559358)
Supplement: MOESM1 [file 9559358]

**Additional file 1 –Rotated Factor Pattern of EFA with 2 Factors**

Exploratory Factor Analysis (EFA) (principal factor analysis, initial communality: SMC, rotation method: PROMAX) with the baseline data of the 20 items allowing for extraction of two factors. The Table shows the rotated factor pattern (Standardized Regression Coefficients) and the variance explained by each factor. The rotated factors are correlated by  $r = 0.683$ . Factor 1, AP-F1, seems to reflect more general memory problems, Factor 2, AP-F2, comprises perceptual or attentional problems in specific situations.

Rotated Factor Pattern (Standardized Regression Coefficients)

|                                                                 | FACTOR1        | FACTOR2        |
|-----------------------------------------------------------------|----------------|----------------|
| APSA item 1                                                     | <b>0.73363</b> | 0.01064        |
| APSA item 3                                                     | 0.17329        | <b>0.53176</b> |
| APSA item 4                                                     | <b>0.47604</b> | 0.25992        |
| APSA item 5                                                     | 0.19776        | <b>0.56600</b> |
| APSA item 6                                                     | <b>0.64870</b> | 0.11185        |
| APSA item 10                                                    | -0.03692       | <b>0.73471</b> |
| APSA item 12                                                    | 0.25229        | <b>0.50106</b> |
| APSA item 13                                                    | 0.03859        | <b>0.68838</b> |
| APSA item 14                                                    | 0.31594        | 0.37447        |
| APSA item 15                                                    | 0.29863        | <b>0.42132</b> |
| APSA item 16                                                    | <b>0.59319</b> | 0.13656        |
| APSA item 19                                                    | <b>0.77252</b> | -0.01073       |
| APSA item 21                                                    | 0.35517        | 0.40684        |
| APSA item 23                                                    | <b>0.58875</b> | 0.14460        |
| APSA item 24                                                    | <b>0.73652</b> | 0.03795        |
| APSA item 26                                                    | <b>0.74108</b> | -0.01210       |
| APSA item 27                                                    | -0.08788       | <b>0.77246</b> |
| APSA item 28                                                    | 0.11021        | <b>0.69174</b> |
| APSA item 29                                                    | <b>0.49044</b> | 0.31043        |
| APSA item 30                                                    | 0.25774        | <b>0.57497</b> |
| Variance Explained by Each Factor<br>Eliminating Other Factors: | 2.318763       | 2.118615       |

**Bold: higher loading resulting in mapping to this factor**
